# Supplementary material
Source: publisher figshare collection journal article supplement (https://plos.figshare.com/articles/dataset/_/3246952)
Supplement: Supplementary file 1 [file 1]

Archive with 5 entries (5 files):
- S1 Fig.PDF
- S2 Fig.PDF
- S3 Fig.PDF
- S1 Table.PDF
- S2 Table.XLSX
