# Supplementary material
Source: publisher figshare collection journal article supplement (https://plos.figshare.com/articles/dataset/_/3246952)
Supplement: Supplementary file 1 [file 1 › S1 Table.PDF]

S2 Table: Barcode adapters used for the Genotyping-By-Sequencing.

|                 | Top strand 5' – 3'                             | Bottom strand 5' – 3'                      |
|-----------------|------------------------------------------------|--------------------------------------------|
| Barcode adapter | ACACTCTTTCCCTACACGACGCTCTTCCGATCT[barcode]TGCA | [barcode]AGATCGGAAGAGCGTCGTGTAGGGAAAGAGTGT |
| Common adapter  | AGATCGGAAGAGCGGTTCAGCAGGAATGCCGAG              | CTCGGCATTCCTGCTGAACCGCTCTTCCGATCTTGCA      |
