# Supplementary material
Source: publisher figshare collection journal article supplement (https://plos.figshare.com/articles/dataset/_/3246952)

**S3 figure:** SNP density by chromosome on a sliding window of 50kb. Graph were generated using the SNP density tool provided by SNIplay (<http://sniplay.cirad.fr>) [85]

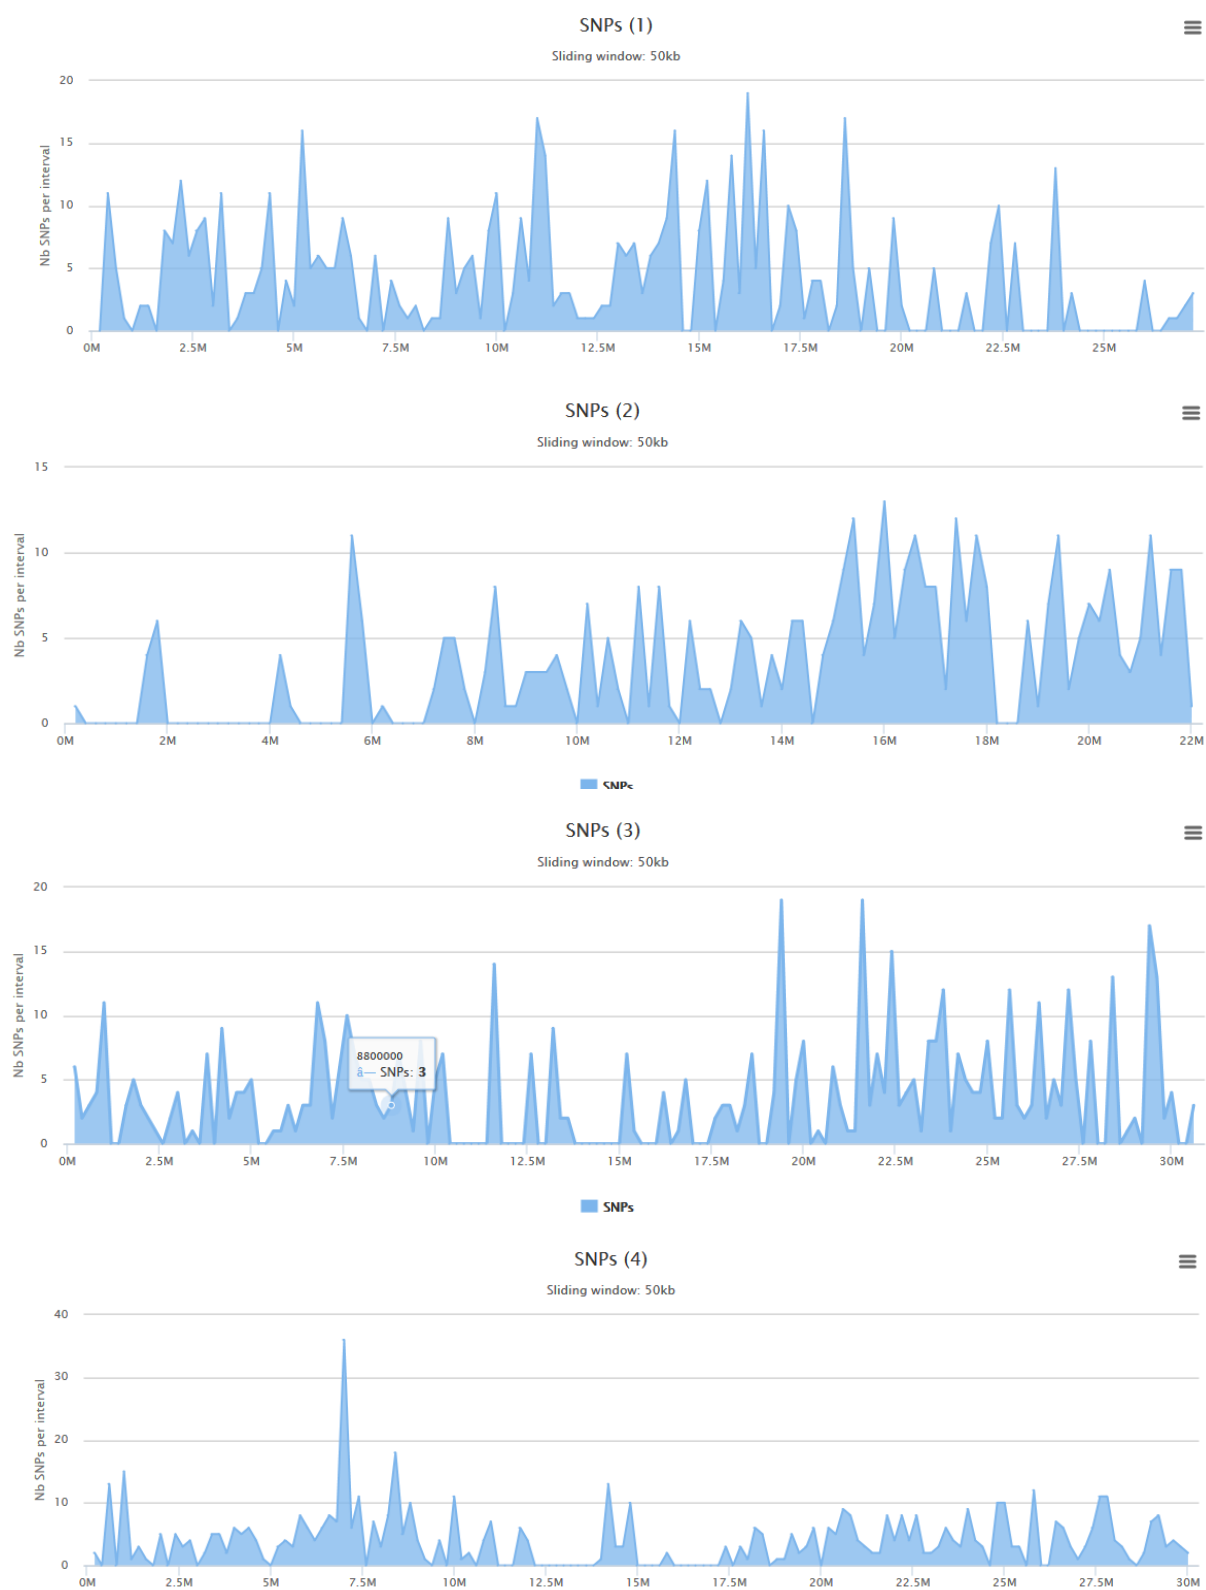

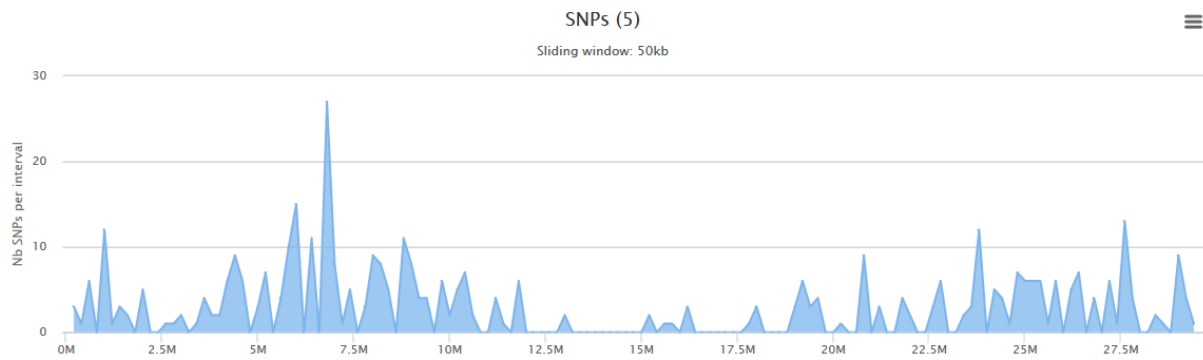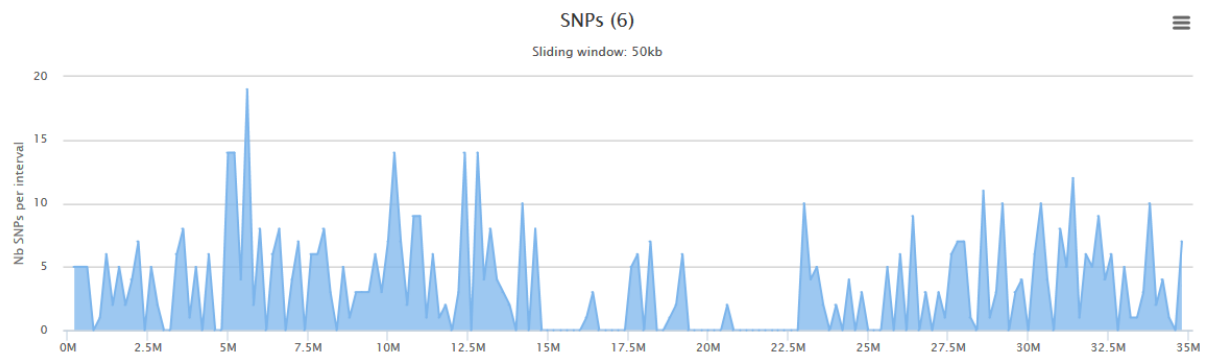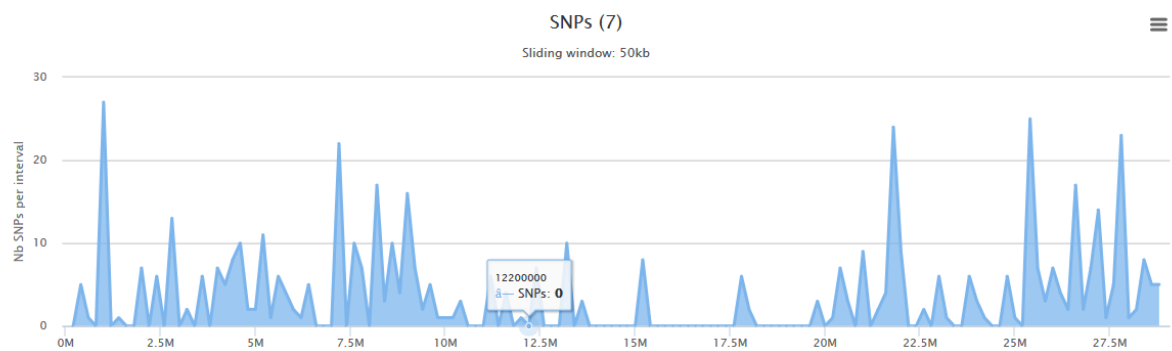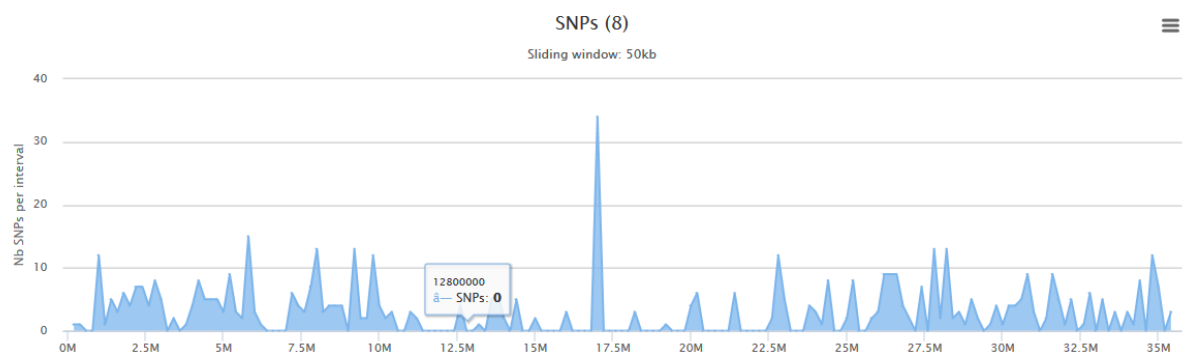

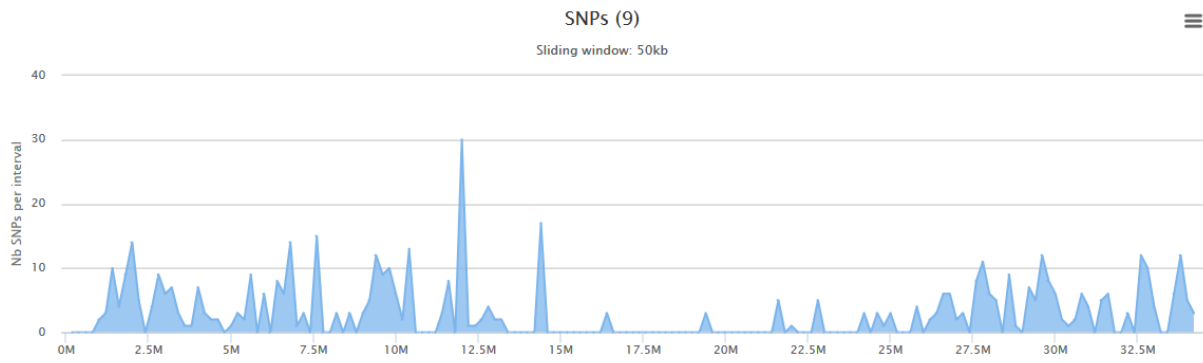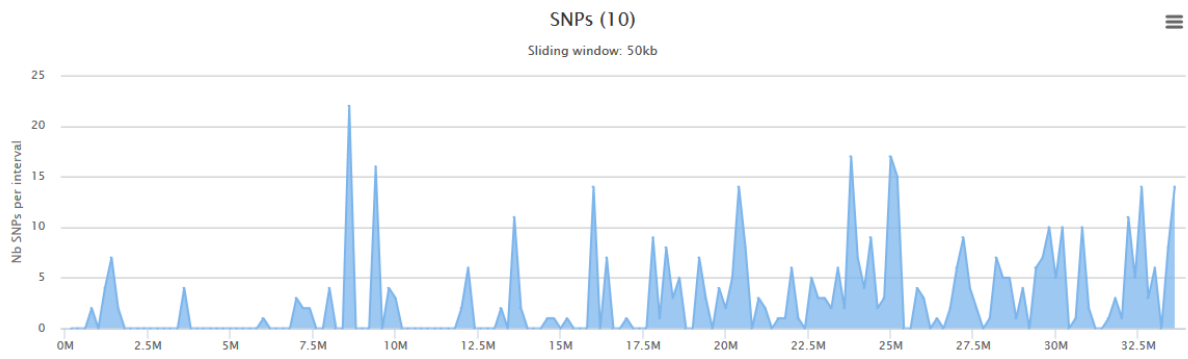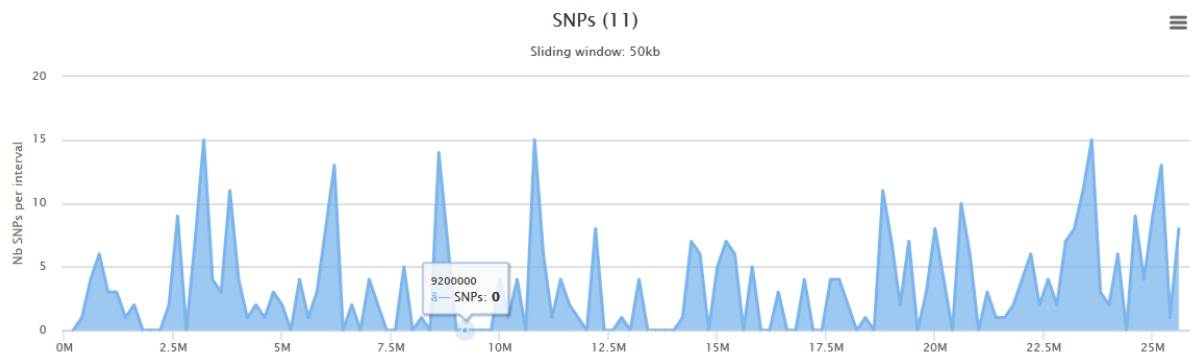

Supplement: Supplementary file 1 [file 1 › S2 Fig.PDF]
