# Supplementary material
Source: publisher figshare collection journal article supplement (https://plos.figshare.com/articles/dataset/_/3246952)
Supplement: Supplementary file 1 [file 1 › S2 Table.XLSX]

## Sheet: Panel List genes 
Locus tag	Chromosome	Start	Stop	Functional annotation	Distance SNP (bp) to the closest significant GWAS SNP
GSMUA_Achr1P02580_001	1	2130903	2137838	Thaumatin-like protein 1a	32637	2170475
GSMUA_Achr1P02590_001	1	2139836	2139916	Translation initiation factor IF-2	30559
GSMUA_Achr1P02610_001	1	2145683	2156635	E3 ubiquitin-protein ligase UPL3	13840
GSMUA_Achr1P02620_001	1	2160927	2164757	Rac-like GTP-binding protein 5	5718
GSMUA_Achr1P02640_001	1	2168372	2168884	Putative Protein FD	1591
GSMUA_Achr1P02650_001	1	2169774	2170710	Expansin-A1~ EXPA1	-235
GSMUA_Achr1P02660_001	1	2172430	2177366	24-methylenesterol C-methyltransferase 2	-6891
GSMUA_Achr1P02670_001	1	2183446	2183961	IQ calmodulin-binding motif	-13486
GSMUA_Achr1P02680_001	1	2184660	2193877	Electron carrier/ protein disulfide oxidoreductase	-23402
GSMUA_Achr1P02690_001	1	2194462	2196439	Dolichol-phosphate mannosyltransferase	-25964
GSMUA_Achr1P02700_001	1	2199001	2207794	tRNA pseudouridine synthase Pus10	-37319
GSMUA_Achr1P02710_001	1	2207826	2208882	NAC group 8a	-38407
GSMUA_Achr3P01280_001	3	928964	932813	Protein binding protein	38291	971104
GSMUA_Achr3P01290_001	3	938822	940568	anaphase-promoting complex subunit 6-like	30536
GSMUA_Achr3P01300_001	3	945285	947274	multicopper oxidase LPR1-like	23830
GSMUA_Achr3P01310_001	3	948966	949605	Pathogenesis-related genes transcriptional activator PTI6-like	21499
GSMUA_Achr3P01320_001	3	950798	951393	Hypothetical protein	19711
GSMUA_Achr3P01340_001	3	955755	960796	Checkpoint serine/threonine-protein kinase BUB1	10308
GSMUA_Achr3P01350_001	3	961998	962537	Zinc finger protein STAMENLESS 1-like	8567
GSMUA_Achr3P01360_001	3	971624	973468	Pentatricopeptide repeat-containing protein	-2364
GSMUA_Achr3P01370_001	3	977749	979992	Transcription factor MYB21	-8888
Unpredicted	3	983143	983838	Uncharacterized protein	-12734
GSMUA_Achr3P01380_001	3	988332	989227	Putative expressed protein	-18123
GSMUA_Achr3P01390_001	3	992632	993553	diacylglycerol kinase kappa-like	-22449
GSMUA_Achr3P01410_001	3	995777	997954	DEAD-box ATP-dependent RNA helicase 21	-26850
GSMUA_Achr3P01420_001	3	1001943	1006422	ATA15 protein	-35318
GSMUA_Achr3P01430_001	3	1009710	1014715	Vacuolar protein sorting-associated protein 4	-38606
GSMUA_Achr3P21330_001	3	22323590	22324642	VQ motif-containing family protein	33990	22358632
Unpredicted	3	22329565	22332392	uncharacterized protein	26240
GSMUA_Achr3P21340_001	3	22335207	22341451	Apoptotic chromatin condensation inducer in the nucleus-like	17181
GSMUA_Achr3P21350_001	3	22341799	22342236	40S ribosomal protein S16	16396
GSMUA_Achr3P21360_001	3	22343432	22350506	Expressed protein	8126
GSMUA_Achr3P21370_001	3	22355860	22357053	Anaphase-promoting complex subunit cdc20	1579
Unpredicted	3	22362176	22363600	UBP1-associated protein 2B-like	-4968
GSMUA_Achr3P21380_001	3	22372199	22379759	Leucine-rich repeat receptor-like protein kinase	-21127
GSMUA_Achr3P21400_001	3	22388789	22390192	15-cis-phytoene desaturase	-31560
GSMUA_Achr3P21410_001	3	22398070	22400013	Laccase-21	-39438
GSMUA_Achr3P22850_001	3	23709726	23712787	GABA transporter 1-like	38361	23751148
GSMUA_Achr3P22860_001	3	23713549	23722602	Putative 3-deoxy-D-manno-octulosonic-acid transferase~ waaA	28546
GSMUA_Achr3P22870_001	3	23726805	23729924	Putative expressed protein~ ARK1~ complete	21224
GSMUA_Achr3P22880_001	3	23732085	23741933	F-box/LRR-repeat protein	9215
GSMUA_Achr3P22890_001	3	23746642	23747649	S-adenosylmethionine decarboxylase proenzyme 1~ SAMDC1	3499
GSMUA_Achr3P22900_001	3	23748318	23754555	Macrophage erythroblast attacher~ MAEA	-3407
GSMUA_Achr3P22910_001	3	23761542	23761736	Histidine kinase 1~ AHK1	-10588
GSMUA_Achr3P22920_001	3	23765387	23769402	Putative Histidine kinase CKI1	-18254
GSMUA_Achr3P22930_001	3	23772808	23772951	Hypothetical protein	-21803
GSMUA_Achr3P22940_001	3	23775427	23779780	Probable NADH dehydrogenase	-28632
GSMUA_Achr3P22950_001	3	23780168	23785427	Dynein light chain LC6	-34279
GSMUA_Achr3P22960_001	3	23787206	23788837	Expressed protein	-37689
GSMUA_Achr3P22970_001	3	23790284	23793476	Predicted protein	-39136
GSMUA_Achr4P07150_001	4	5304739	5333399	myosin, putative, expressed~ myoJ	33022	5366421
GSMUA_Achr4P07160_001	4	5335156	5339094	Methyltransferase-like protein 2	27327
GSMUA_Achr4P07170_001	4	5343205	5343994	Homeodomain leucine zipper protein class 1~ HOX14	22427
GSMUA_Achr4P07180_001	4	5344090	5352872	Ethylene-responsive element-binding protein	13549
GSMUA_Achr4P07190_001	4	5358776	5360344	Putative Scarecrow-like protein 15~ SCL15	6077
GSMUA_Achr4P07200_001	4	5364860	5367289	C2H2-like zinc finger protein	-868
GSMUA_Achr4P07210_001	4	5373617	5380034	Eukaryotic aspartyl protease domain containing protein, expressed	-13613
GSMUA_Achr4P07220_001	4	5386015	5388073	Probable indole-3-acetic acid-amido synthetase GH3.8	-21652
GSMUA_Achr4P07230_001	4	5396511	5400388	Probable WRKY transcription factor 4~ WRKY4	-33967
GSMUA_Achr4P07240_001	4	5403215	5403822	Hypothetical protein	-37401
GSMUA_Achr4P07250_001	4	5405799	5406327	Hypothetical protein	-39906
Unpredicted	5	11577302	11590842	AT-rich interactive domain-containing protein 2-like	26196	11617038
GSMUA_Achr5P15600_001	5	11608632	11610076	Ras-related protein Rab-18	6962
GSMUA_Achr5P15610_001	5	11616605	11617406	Thaumatin-like protein 1a	-368
GSMUA_Achr5P15620_001	5	11638620	11641100	Probable pectate lyase 15	-24062
Unpredicted	7	21694993	21696270	Putative Aspartic proteinase nepenthesin-1	39436	21735706
GSMUA_Achr7G18850_001	7	21697762	21700193	MORN repeat domain containing protein	35513
Unpredicted	7	21703495	21707194	F-box family protein	28512
GSMUA_Achr7P18860_001	7	21708753	21712586	Phosphate carrier protein, mitochondrial	23120
GSMUA_Achr7P18870_001	7	21721454	21724816	lipase, putative, expressed~ LIP~ complete	10890
GSMUA_Achr7P18880_001	7	21725684	21732717	Zeaxanthin epoxidase, chloroplastic, ZEP	2989
GSMUA_Achr7P18890_001	7	21732820	21733240	Hypothetical protein~ unknown_gene~ missing_functional_completeness	2466
GSMUA_Achr7P18900_001	7	21734212	21736267	Heat stress transcription factor B-1~ HSFB1	-561
GSMUA_Achr7P18910_001	7	21739334	21741414	Hypothetical protein	-5708
GSMUA_Achr7P18920_001	7	21744151	21746102	Alpha-amylase isozyme 3D~ AMY1.3	-10396
GSMUA_Achr7P18930_001	7	21748033	21748452	AP2 domain containing protein, expressed	-12746
GSMUA_Achr7P18940_001	7	21759430	21759978	Putative uncharacterized protein	-24272
GSMUA_Achr7P18950_001	7	21762478	21762996	AGAP010609-PA, putative, expressed	-27290
GSMUA_Achr7P18960_001	7	21764261	21765235	Probable gibberellin receptor GID1L1	-29529
GSMUA_Achr7P18970_001	7	21766565	21767671	DUF1645 domain containing protein	-31965
GSMUA_Achr7P18980_001	7	21777684	21779353	Putative Patatin group A-3	-43647
GSMUA_Achr7P18990_001	7	21782035	21794751	Putative GPI ethanolamine phosphate transferase 2	-59045
GSMUA_Achr7P19000_001	7	21801546	21802202	putative DNA-binding protein ESCAROLA	-66496
GSMUA_Achr7P19020_001	7	21823553	21829213	Putative Ubiquitin carboxyl-terminal hydrolase 17	96490
GSMUA_Achr7P19030_001	7	21840945	21845159	Expressed protein	79098
GSMUA_Achr7P19040_001	7	21850154	21852189	Cyclin-D3-1	69889
GSMUA_Achr7P19050_001	7	21853895	21854947	Putative Serine/threonine-protein kinase-like protein	66148
GSMUA_Achr7P19060_001	7	21860508	21861323	Zinc finger homeodomain protein 1	59535
GSMUA_Achr7P19070_001	7	21870751	21878260	Phosphoribosylaminoimidazole-succinocarboxamide synthase, chloroplastic~ PUR7	49292
GSMUA_Achr7P19080_001	7	21882797	21887924	Putative Glucan 1,3-beta-glucosidase A~ exgA	37246
GSMUA_Achr7P19090_001	7	21891868	21893013	RING-H2 finger protein ATL52-like	28175
GSMUA_Achr7P19100_001	7	21909196	21909931	Histone H3	10847
Unpredicted	7	21910952	21911200	uncharacterized protein	9091
GSMUA_Achr7P19110_001	7	21912177	21914869	14-3-3-like protein 16R~ TFT6	7866
GSMUA_Achr7P19120_001	7	21915853	21930469	Putative tRNA (cytosine-5-)-methyltransferase NSUN2	4190
GSMUA_Achr7P19130_001	7	21932283	21937709	Predicted protein	-12240
GSMUA_Achr7P19150_001	7	21939829	21941366	Melanoma-associated antigen G1	-19786
GSMUA_Achr7P19160_001	7	21946809	21948927	Ubiquitin carboxyl-terminal hydrolase 4	-26766	21920043
GSMUA_Achr9P06020_001	9	3845913	3847822	stress-induced protein, putative	30332	3878154
GSMUA_Achr9P06030_001	9	3848856	3855704	Probable glutamate carboxypeptidase 2	22450
GSMUA_Achr9P06040_001	9	3862743	3864319	IQ calmodulin-binding motif family protein	13835
GSMUA_Achr9P06050_001	9	3871603	3873585	Putative Hexokinase-2	4569
GSMUA_Achr9P06060_001	9	3873988	3878394	Putative Receptor-like protein kinase 5	-240
GSMUA_Achr9P06070_001	9	3883535	3884398	Putative Uncharacterized oxidoreductase ykwC	-6244
GSMUA_Achr9P06080_001	9	3887075	3888625	RNA methyltransferase, TrmH family protein	-10471
GSMUA_Achr9P06090_001	9	3891226	3891962	Expressed protein	-13808
GSMUA_Achr9P06100_001	9	3892054	3907089	Expressed protein	-28935
GSMUA_Achr9P06110_001	9	3910978	3916508	CK1_CaseinKinase_1a.5	-38354
GSMUA_Achr9P26400_001	9	30847753	30850992	Mitochondrial import receptor subunit TOM6	35271	30886263
GSMUA_Achr9P26410_001	9	30852226	30853326	RING-H2 finger protein ATL65	32937
GSMUA_Achr9P26430_001	9	30854512	30858383	Cold acclimation protein WCOR413	27880
GSMUA_Achr9P26440_001	9	30861821	30864057	BTB/POZ domain-containing protein	22206
GSMUA_Achr9P26450_001	9	30871733	30877936	Tetratricopeptide repeat containing protein	8327
GSMUA_Achr9P26460_001	9	30883490	30886622	Wall-associated receptor kinase-like 14~ WAKL14	-359
GSMUA_Achr9P26470_001	9	30892904	30894382	F-box/WD repeat-containing protein 7	-8119
GSMUA_Achr9P26490_001	9	30909810	30910063	Glyoxalase/bleomycin resistance protein/dioxygenase	-23800
GSMUA_Achr9P26530_001	9	30917197	30919912	Hypothetical protein	-33649
GSMUA_Achr9P26540_001	9	30921350	30924033	Probable thylakoidal processing peptidase 2, chloroplastic	-37770
GSMUA_Achr9P26550_001	9	30924497	30934974	kinesin motor domain containing protein	-38234
GSMUA_Achr10P02150_001	10	5751828	5764057	Putative Villin-3	36432	5800489
GSMUA_Achr10P02810_001	10	9251663	9251869	Protein EPIDERMAL PATTERNING FACTOR 2	32393	9284262
GSMUA_Achr11P14140_001	11	15210075	15211073	Putative expressed protein	39231	15250304
GSMUA_Achr11P14150_001	11	15211751	15214834	Aquaporin SIP1-2	35470
GSMUA_Achr11P14160_001	11	15215290	15216685	Uncharacterized UDP-glucosyltransferase	33619
Unpredicted	11	15228286	15228618	Protein phosphatase 1 regulatory subunit	21686
GSMUA_Achr11P14170_001	11	15230512	15231423	Myb DNA-binding	18881
GSMUA_Achr11P14180_001	11	15235511	15235969	Hypothetical protein	14335
GSMUA_Achr11P14190_001	11	15241872	15247756	DEAD-box ATP-dependent RNA helicase 57	2548
GSMUA_Achr11P14210_001	11	15248784	15252416	U6 snRNA-associated Sm-like protein LSm2	-2112
GSMUA_Achr11P14220_001	11	15261341	15262030	Ribosomal protein L34e superfamily protein	-11726
GSMUA_Achr11P14230_001	11	15285211	15299301	Polygalacturonase	-34907
GSMUA_Achr11P24640_001	11	24082316	24085457	Hypothetical protein	37166	24122623
GSMUA_Achr11P24650_001	11	24087822	24090564	Putative Galactosylgalactosylxylosylprotein 3-beta-glucuronosyltransferase 1	32059
GSMUA_Achr11P24660_001	11	24092985	24094214	Hypothetical protein	28409
GSMUA_Achr11P24670_001	11	24098004	24107276	RNA pseudouridine synthase 5	15347
GSMUA_Achr11P24680_001	11	24107968	24109096	TOX high mobility group box family	13527
GSMUA_Achr11P24690_001	11	24116060	24116930	Transcription factor MYB59	5693
GSMUA_Achr11P24700_001	11	24119513	24122613	RNA recognition motif containing protein	10
GSMUA_Achr11P24710_001	11	24123452	24126726	Dehydroascorbate reductase	-4103
GSMUA_Achr11P24730_001	11	24129340	24131262	Zinc finger CCCH domain-containing protein 33	-8639
GSMUA_Achr11P24740_001	11	24132526	24134809	Omega-3 fatty acid desaturase, chloroplastic~ FAD7	-12186
GSMUA_Achr11P24750_001	11	24135961	24138177	Acetylornithine aminotransferase, mitochondrial~ AG118	-15554
GSMUA_Achr11P24760_001	11	24140958	24142687	Eskimo1	-20064
GSMUA_Achr11P24770_001	11	24144809	24155313	AMP deaminase~ AMPD	-32690
GSMUA_Achr11P24780_001	11	24156785	24159235	Pyruvate decarboxylase isozyme 2~ PDC2	-36612

## Sheet: Subset list genes
Locus tag	Chromosome	Start	Stop	Gene annotation
GSMUA_Achr4P07260_001	4	5408131	5414296	Putative Probable leucine-rich repeat receptor-like protein kinase
GSMUA_Achr4P07270_001	4	5414944	5416389	UDP-glucose 6-dehydrogenase~ UGD1
GSMUA_Achr4P07280_001	4	5434849	5436861	Putative RNA-binding protein~ GRP2
GSMUA_Achr4P07290_001	4	5436891	5437167	Putative Glycine-rich RNA-binding protein 2
GSMUA_Achr4P07300_001	4	5439643	5444811	Putative expressed protein
GSMUA_Achr4P07310_001	4	5447971	5449801	Whole genome shotgun sequence of line PN40024
GSMUA_Achr4P07320_001	4	5454250	5456801	Scarecrow-like protein 4~ SCL4
GSMUA_Achr4P07330_001	4	5457630	5461100	Putative Maf-like protein
GSMUA_Achr4P07340_001	4	5464264	5464572	Putative 60S ribosomal protein L6
GSMUA_Achr4P07350_001	4	5465872	5468443	60S ribosomal protein L10a-1
GSMUA_Achr4P07360_001	4	5468607	5470136	Hypothetical protein
GSMUA_Achr4P07370_001	4	5471492	5474806	leucine-rich repeat receptor-like serine/threonine-protein kinase BAM1, BAM2
GSMUA_Achr4P07480_001	4	5528455	5530089	Predicted protein
GSMUA_Achr4P07490_001	4	5530263	5531850	Expressed protein
GSMUA_Achr4P07500_001	4	5533650	5537916	Kinase, pfkB family, putative
GSMUA_Achr4P07510_001	4	5539180	5542673	Putative Lysosomal beta glucosidase
