# Supplementary material
Source: publisher figshare collection journal article supplement (https://plos.figshare.com/articles/dataset/_/3246952)

a.

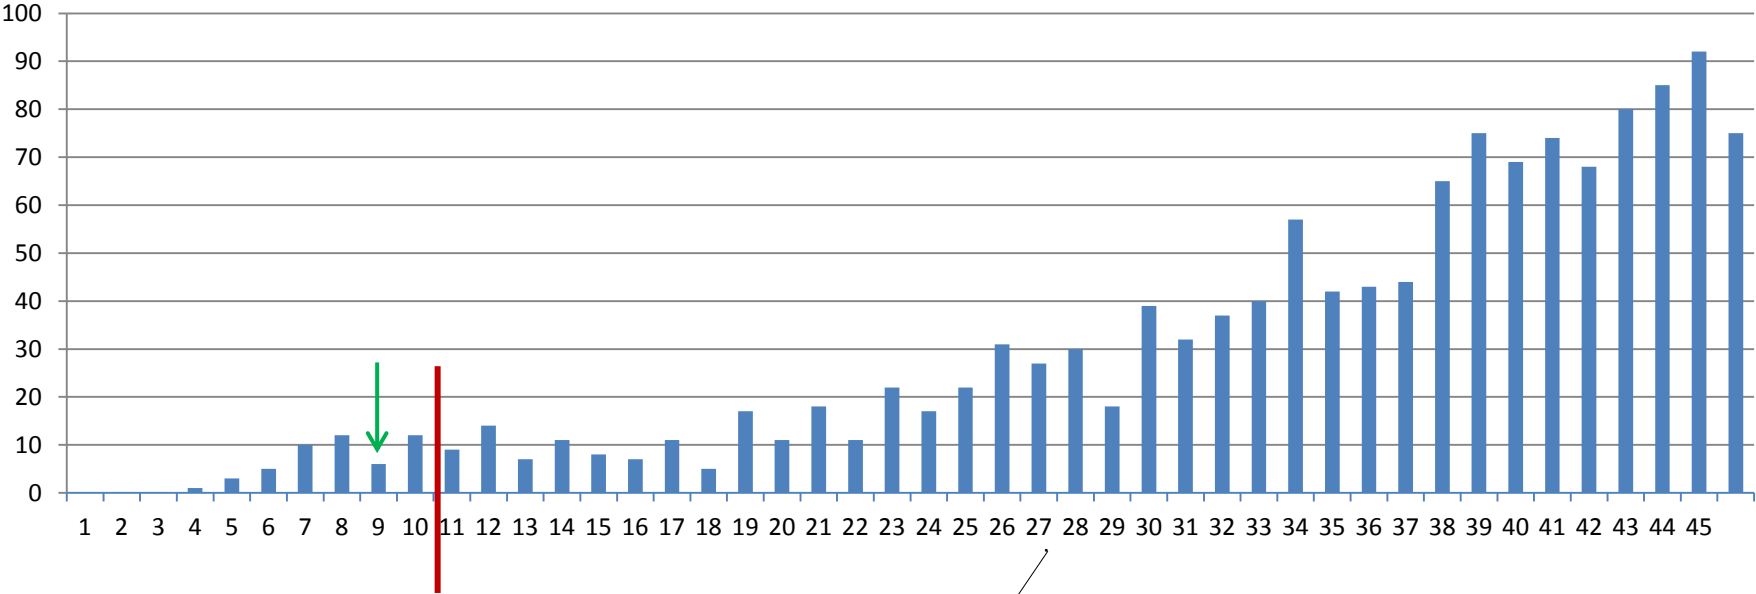

b.

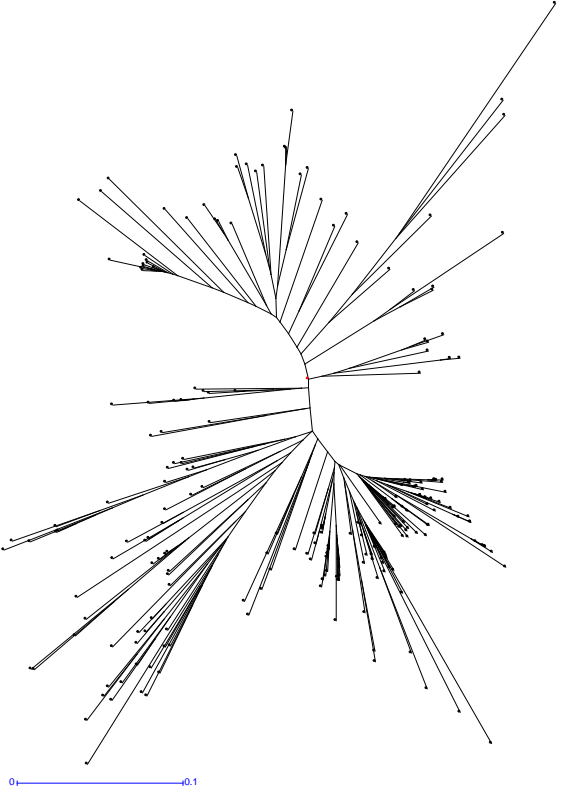

Supplement: Supplementary file 1 [file 1 › S1 Fig.PDF]

Panel MAF 5% GLM

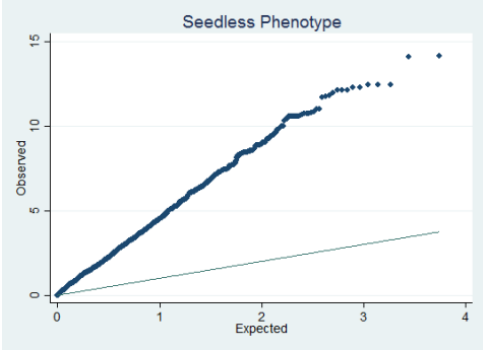

Panel MAF 5% MLM K + Q (K=4)

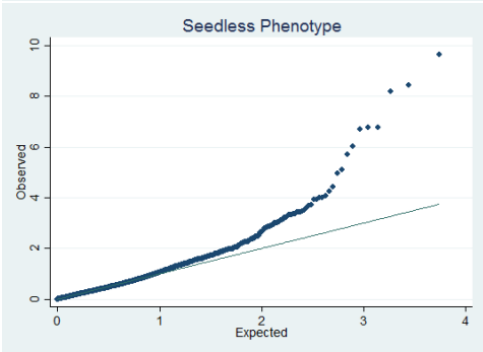

Subset MAF 5% GLM

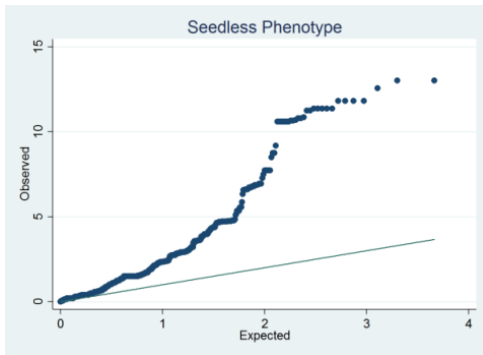

Subset MAF 5% MLM K

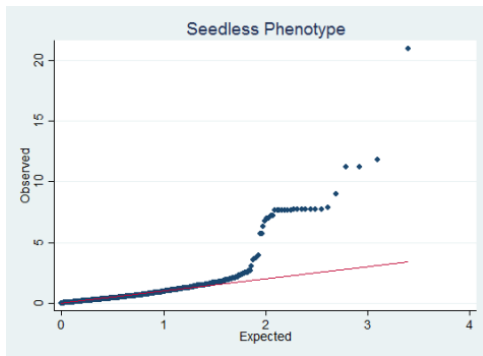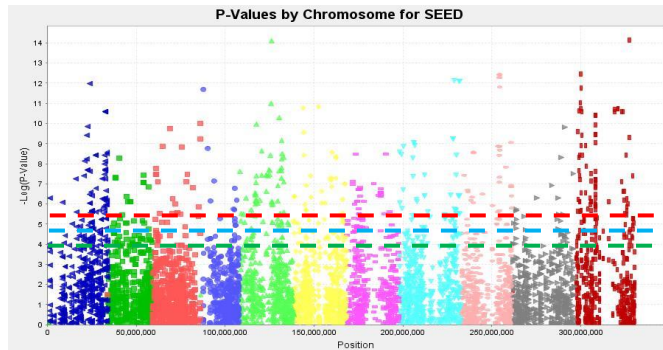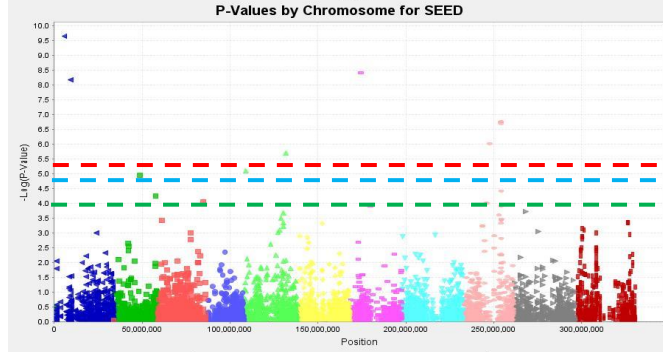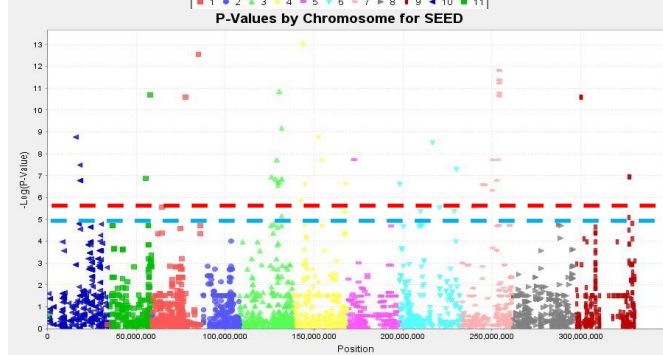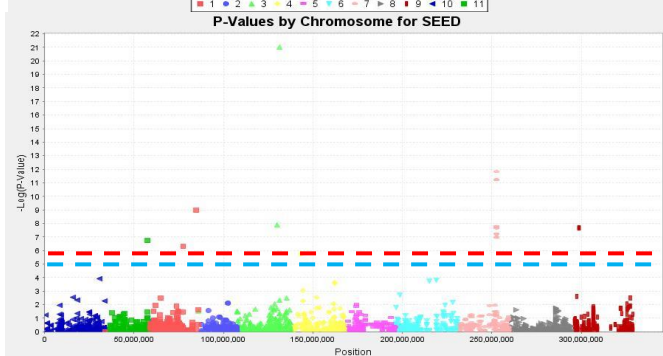

Supplement: Supplementary file 1 [file 1 › S3 Fig.PDF]
